REVIEW PAPER

# Auxin biosynthesis and storage forms

David A. Korasick, Tara A. Enders and Lucia C. Strader\*

Department of Biology, Washington University in St. Louis, St Louis, MO 63130, USA

\* To whom correspondence should be addressed. E-mail: [strader@wustl.edu](mailto:strader@wustl.edu)

Received 15 January 2013; Revised 26 February 2013; Accepted 27 February 2013

## Abstract

The plant hormone auxin drives plant growth and morphogenesis. The levels and distribution of the active auxin indole-3-acetic acid (IAA) are tightly controlled through synthesis, inactivation, and transport. Many auxin precursors and modified auxin forms, used to regulate auxin homeostasis, have been identified; however, very little is known about the integration of multiple auxin biosynthesis and inactivation pathways. This review discusses the many ways auxin levels are regulated through biosynthesis, storage forms, and inactivation, and the potential roles modified auxins play in regulating the bioactive pool of auxin to affect plant growth and development.

**Key words:** auxin, auxin biosynthesis, auxin conjugates, development, IAA, IBA.

## Introduction

Maintaining appropriate cellular levels of active auxin is important for regulating all aspects of plant growth and development. Cellular auxin levels can be altered by auxin transport, auxin biosynthesis, and interconversion of modified auxin forms. In this review, we focus on the various forms of auxin precursors and their roles in contributing to auxin homeostasis and plant development.

Many small molecules, when supplied exogenously, induce an auxin response. These compounds include naturally occurring active auxins (Fig. 1A), such as indole-3-acetic acid (IAA), 4-chloroindole-3-acetic acid (4-Cl-IAA), and phenylacetic acid (PAA); naturally occurring inactive auxin precursors, such as indole-3-pyruvic acid (IPyA), indoleacetamine (IAM), indole-3-acetaldoxime (IAOx), indole-3-acetonitrile (IAN), and indole-3-acetaldehyde (IAAld); and naturally occurring auxin storage forms, such as indole-3-butyric acid (IBA), methyl-IAA (MeIAA), and auxins conjugated to amino acids or sugars. Additionally, synthetic compounds (Fig. 1B), such as 2,4-dichlorophenoxyacetic acid (2,4-D), 1-naphthaleneacetic acid (NAA), 3,6-dichloro-2-methoxybenzoic acid (dicamba), and 4-amino-3,5,6-trichloropicolinic

acid (picloram), induce an auxin response. In this review, we focus on the various forms of naturally occurring active and inactive auxins and auxin precursors (Table 1), as well as roles for inputs from different modified auxins to the active auxin pool affecting plant growth and development.

## Active auxins

### IAA

IAA is the best-studied naturally occurring active auxin. IAA biosynthesis can occur through two major routes: tryptophan (Trp)-dependent and Trp-independent pathways (reviewed by Woodward and Bartel, 2005). Several Trp-dependent auxin biosynthesis pathways contribute to IAA levels, including the IAOx pathway, the IAM pathway, and the IPyA pathway (Fig. 2).

### The IAOx pathway

The IAOx pathway has been suggested to occur only in crucifers (Sugawara *et al.*, 2009); however, IAN, a downstream

Abbreviations: 2,4-D, 2,4-dichlorophenoxyacetic acid; 4-Cl-IAA, 4-chloroindole-3-acetic acid; dicamba, 3,6-dichloro-2-methoxybenzoic acid; IAA, indole-3-acetic acid; IAAld, indole-3-acetaldehyde; IAM, indole-3-acetamide; IAN, indole-3-acetonitrile; IAOx, indole-3-acetaldoxime; IBA, indole-3-butyric acid; IPrA, indole-3-propionic acid; IPyA, indole-3-pyruvic acid; MeIAA, methyl-IAA; NAA, 1-naphthaleneacetic acid; oxIAA, oxindole-3-acetic acid; PAA, phenylacetic acid, Trp, tryptophan.

© The Author [2013]. Published by Oxford University Press [on behalf of the Society for Experimental Biology]. All rights reserved.  
For permissions, please email: [journals.permissions@oup.com](mailto:journals.permissions@oup.com)

## (A) Naturally-occurring active auxins

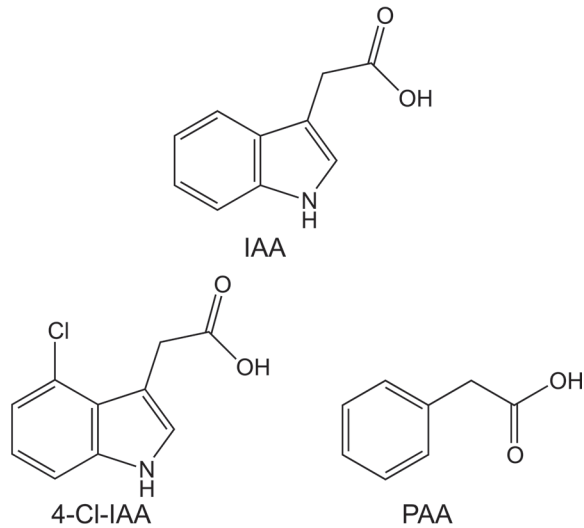

## (B) Synthetic active auxins

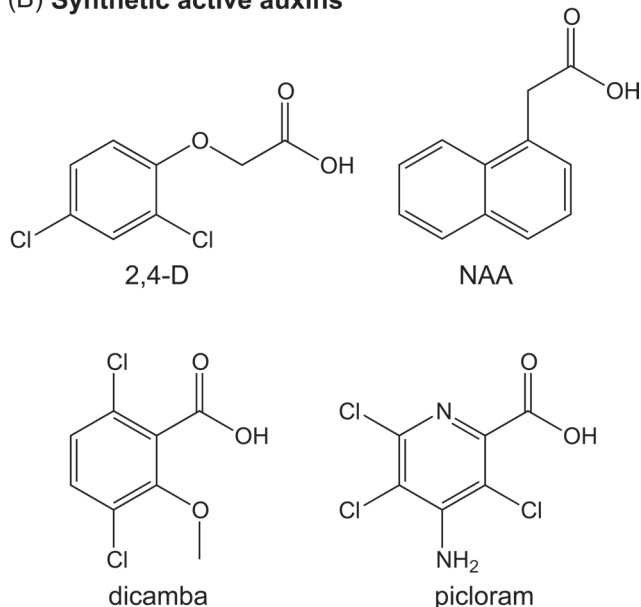

**Fig. 1.** Naturally occurring and synthetic active auxins. (A) Indole-3-acetic acid (IAA), 4-chloroindole-3-acetic acid (4-Cl-IAA), and phenylacetic acid (PAA) are naturally occurring active auxins. (B) 2,4-Dichlorophenoxyacetic acid (2,4-D), 1-naphthaleneacetic acid (NAA), 3,6-dichloro-2-methoxybenzoic acid (dicamba), and 4-amino-3,5,6-trichloropicolinic acid (picloram) are active synthetic auxins.

intermediate, has also been detected in maize coleoptiles (Bak et al., 1998). The cytochrome P450 enzymes CYP79B2 and CYP79B3 convert Trp to IAOx (Hull et al., 2000; Mikkelsen et al., 2000; Zhao et al., 2002). IAOx is largely used to produce defence compounds such as glucosinolates or camalexins (Bak et al., 2001; Zhao et al., 2002; Mikkelsen et al., 2004) and is also used to produce IAA (Zhao et al., 2002; Sugawara et al., 2009). Overexpression of CYP79B2 results in increased levels of indole glucosinolates (Mikkelsen et al., 2000; Zhao

et al., 2002), IAN (Zhao et al., 2002), and free IAA (Zhao et al., 2002), accompanied by long hypocotyls and epinasitic cotyledons (Zhao et al., 2002). Conversely, the *cyp79b2 cyp79b3* double mutant displays decreased IAOx (Zhao et al., 2002; Sugawara et al., 2009), IAN (Zhao et al., 2002; Sugawara et al., 2009), IAM (Sugawara et al., 2009), and free IAA under normal (Sugawara et al., 2009) or elevated (Zhao et al., 2002) temperatures, suggesting that both IAN and IAM are downstream intermediates of the IAOx pathway. In addition, *cyp79b2 cyp79b3* displays slightly shorter petioles and smaller leaves (Zhao et al., 2002), consistent with roles for IAOx-derived auxin driving these processes. Although IAN, an intermediate downstream from IAOx, was previously thought to be downstream of the glucosinolate pathway, *superroot1* mutants, defective in glucosinolate biosynthesis, display normal IAN levels (Sugawara et al., 2009), consistent with IAN being produced independently of glucosinolates; however, the enzymatic steps between IAOx and IAN have yet to be identified. IAN can then be converted to active IAA through the activities of the NIT1 family of nitrolases (Schmidt et al., 1996; Normanly et al., 1997).

*The IAM pathway*

IAM, another source of auxin, is likely made from both IAOx and an additional unknown source (Sugawara et al., 2009). IAM levels are decreased in the *cyp79b2 cyp79b3* mutant (Sugawara et al., 2009), which is defective in conversion of Trp to IAOx (Mikkelsen et al., 2000; Zhao et al., 2002), consistent with IAOx contributing to IAM levels. In addition, synthesis of IAM from IAOx has been directly demonstrated in assays where *cyp79b2 cyp79b3* was fed  $^{13}\text{C}_6$ -labelled IAOx to generate  $^{13}\text{C}_6$ -labelled IAM (Sugawara et al., 2009). Ratios of enriched IAM and IAN from these studies suggest that IAN and IAM are also produced independently from IAOx (Sugawara et al., 2009). Additionally, IAM has been detected in many species in which IAOx has not been detected (Table 1), raising the possibility that IAM can also be produced in an IAOx-independent pathway. IAM can be converted to active IAA through the activity of AMIDASE1 (Pollmann et al., 2003).

*The IPyA pathway*

The IPyA pathway appears to be the main contributor to free IAA (reviewed by Zhao, 2012) and is the only pathway in which every step from Trp to IAA has been identified (Fig. 2). Conversion of Trp to IAA via the IPyA pathway is a two-step process: the TRYPTOPHAN AMINOTRANSFERASE OF ARABIDOPSIS (TAA) family of Trp aminotransferases converts Trp to IPyA, and the YUCCA (YUC) family of flavin monooxygenases converts IPyA to IAA. Mutation of *TAA1/SHADE AVOIDANCE3/WEAK ETHYLENE INSENSITIVE8/TRANSPORT INHIBITOR RESPONSE2 (TAA1/SAV3/WEI8/TIR2)* results in decreased free IAA, and TAA1 has been shown to convert Trp to IPyA (Stepanova et al., 2008; Tao et al., 2008). *wei8 tar2* mutants, defective in *TAA1* and the related *TRYPTOPHAN AMINOTRANSFERASE RELATED2*, display altered meristem function and floral phenotypes suggestive of decreased

**Table 1.** Occurrence of modified auxin forms and precursors.

| Modified auxin form                   | Purpose              | Species in which identified (reference)                                                                                                                                                                                                                                                                                                                                                                                                                                                                                                                                                                                                                                                                                                                                                                                                                                                                               |
|---------------------------------------|----------------------|-----------------------------------------------------------------------------------------------------------------------------------------------------------------------------------------------------------------------------------------------------------------------------------------------------------------------------------------------------------------------------------------------------------------------------------------------------------------------------------------------------------------------------------------------------------------------------------------------------------------------------------------------------------------------------------------------------------------------------------------------------------------------------------------------------------------------------------------------------------------------------------------------------------------------|
| 4-Chloroindole acetic acid (4-Cl-IAA) | Active auxin         | <i>Lens culinaris</i> (Engvild et al., 1981); <i>Lathyrus latifolius</i> (Engvild et al., 1980); <i>Lathyrus maritimus</i> (Engvild et al., 1981); <i>Lathyrus odoratus</i> (Engvild et al., 1981); <i>Lathyrus sativus</i> (Engvild et al., 1981); <i>Pinus sylvestris</i> (Ernstsen and Sandberg, 1986); <i>Pisum sativum</i> (Schneider et al., 1985; Barkawi et al., 2008); <i>Vicia amurensis</i> (Engvild et al., 1981); <i>Vicia faba</i> (Engvild et al., 1981); <i>Vicia sativa</i> (Engvild et al., 1981)                                                                                                                                                                                                                                                                                                                                                                                                   |
| Phenylacetic acid (PAA)               | Active auxin         | <i>Helianthus annuus</i> (Wightman and Rauthan, 1974; Wightman and Lighty, 1982); <i>Hordeum vulgare</i> (Wightman and Lighty, 1982); <i>Lycopersicon esculentum</i> (Wightman and Rauthan, 1974; Wightman and Lighty, 1982); <i>Phaseolus</i> (Okamoto et al., 1967); <i>Phaseolus vulgaris</i> (Okamoto et al., 1967); <i>Pisum sativum</i> (Wightman and Lighty, 1982); <i>Porphyra tenera</i> (Fries and Iwasaki, 1976); <i>Triticum aestivum</i> (Wightman and Lighty, 1982); <i>Tropaeolum majus</i> (Ludwig-Müller and Cohen, 2002); <i>Undaria pinnatifida</i> (Abe et al., 1974); <i>Zea mays</i> (Wightman and Lighty, 1982);                                                                                                                                                                                                                                                                               |
| Indole-3-acetaldoxime (IAOx)          | Auxin precursor      | <i>Arabidopsis thaliana</i> (Sugawara et al., 2009; Novák et al., 2012); <i>Brassica campestris</i> spp. <i>pekinensis</i> (Ludwig-Müller and Hilgenberg, 1988)                                                                                                                                                                                                                                                                                                                                                                                                                                                                                                                                                                                                                                                                                                                                                       |
| Indole-3-acetonitrile (IAN)           | Auxin precursor      | <i>Arabidopsis thaliana</i> (Normanly et al., 1993; Ilić et al., 1996; Zhao et al., 2002; Sugawara et al., 2009; Novák et al., 2012); <i>Brassica campestris</i> (Jones et al., 1952); <i>Brassica juncea</i> (Pedras et al., 2002); <i>Zea mays</i> (Bak et al., 1998; Park et al., 2003)                                                                                                                                                                                                                                                                                                                                                                                                                                                                                                                                                                                                                            |
| Indoleacetamide (IAM)                 | Auxin precursor      | <i>Arabidopsis thaliana</i> (Pollmann et al., 2002; Sugawara et al., 2009; Novák et al., 2012); <i>Cucurbita maxima</i> (Rajagopal et al., 1994); <i>Nicotiana tabacum</i> (Sugawara et al., 2009); <i>Oryza sativa</i> (Sugawara et al., 2009); <i>Zea mays</i> (Sugawara et al., 2009)                                                                                                                                                                                                                                                                                                                                                                                                                                                                                                                                                                                                                              |
| Indole-3-pyruvic acid (IPyA)          | Auxin precursor      | <i>Arabidopsis thaliana</i> (Tam and Normanly, 1998; Mashiguchi et al., 2011; Won et al., 2011; Liu et al., 2012; Novák et al., 2012); <i>Lycopersicon esculentum</i> (Cooney and Nonhebel, 1989; Liu et al., 2012); <i>Pisum sativum</i> nodules (Badenoch-Jones et al., 1984)                                                                                                                                                                                                                                                                                                                                                                                                                                                                                                                                                                                                                                       |
| Indole-3-acetaldehyde (IAAld)         | Auxin precursor      | <i>Arabidopsis thaliana</i> (Mashiguchi et al., 2011; Novák et al., 2012); <i>Pisum sativum</i> (Quittenden et al., 2009); <i>Pinus sylvestris</i> (Ernstsen and Sandberg, 1986)                                                                                                                                                                                                                                                                                                                                                                                                                                                                                                                                                                                                                                                                                                                                      |
| Indole-3-butyric acid (IBA)           | Precursor/storage    | <i>Arabidopsis thaliana</i> (Ludwig-Müller et al., 1993; Strader et al., 2010; Liu et al., 2012); <i>Daucus carota</i> (Epstein et al., 1991); <i>Medicago truncatula</i> (Campanella et al., 2008); <i>Nicotiana tabacum</i> (Sutter and Cohen, 1992); <i>Pisum sativum</i> nodules (Badenoch-Jones et al., 1984); <i>Pisum sativum</i> (Schneider et al., 1985); <i>Solanum tuberosum</i> (Blommaert, 1954) <i>Tropaeolum majus</i> (Ludwig-Müller and Cohen, 2002); <i>Zea mays</i> (Epstein et al., 1989; Barkawi et al., 2008)                                                                                                                                                                                                                                                                                                                                                                                   |
| IBA–glucose                           | Precursor/storage    | <i>Arabidopsis thaliana</i> (Tognetti et al., 2010)                                                                                                                                                                                                                                                                                                                                                                                                                                                                                                                                                                                                                                                                                                                                                                                                                                                                   |
| Methyl-IAA(MelAA)                     | Precursor/storage    | <i>Arabidopsis thaliana</i> (Narasimhan et al., 2003); <i>Vitis vinifera</i> (Gouthu et al., 2013)                                                                                                                                                                                                                                                                                                                                                                                                                                                                                                                                                                                                                                                                                                                                                                                                                    |
| IAA–glucose/IAA–glycan                | Storage              | <i>Arabidopsis thaliana</i> (Tam et al., 2000); <i>Avena sativa</i> (reviewed by Cohen and Bandurski, 1982); legumes (Jakubowska and Kowalczyk, 2004); <i>Pinus pinea</i> (Riov and Gottlieb, 1980); Tobacco (Sitbon et al., 1993); <i>Zea mays</i> (reviewed by Cohen and Bandurski, 1982)                                                                                                                                                                                                                                                                                                                                                                                                                                                                                                                                                                                                                           |
| IAA–myo-inositol                      | Storage              | <i>Arabidopsis thaliana</i> (Luo et al., 2011); <i>Oryza sativa</i> (Hall, 1980); <i>Zea mays</i> (Nicholls, 1967; Chisnell, 1984)                                                                                                                                                                                                                                                                                                                                                                                                                                                                                                                                                                                                                                                                                                                                                                                    |
| IAA–Asp–glucose                       | Storage/inactivation | <i>Oryza sativa</i> (Kai et al., 2007)                                                                                                                                                                                                                                                                                                                                                                                                                                                                                                                                                                                                                                                                                                                                                                                                                                                                                |
| IAA–Glu–glucose                       | Storage/inactivation | <i>Oryza sativa</i> (Kai et al., 2007)                                                                                                                                                                                                                                                                                                                                                                                                                                                                                                                                                                                                                                                                                                                                                                                                                                                                                |
| IAA–Ala                               | Storage              | <i>Arabidopsis thaliana</i> (Kowalczyk and Sandberg, 2001); <i>Oryza sativa</i> (Kojima et al., 2009); <i>Piscia abies</i> (Östin et al., 1992)                                                                                                                                                                                                                                                                                                                                                                                                                                                                                                                                                                                                                                                                                                                                                                       |
| IAA–Asp                               | Inactivation         | <i>Arabidopsis thaliana</i> (Östin et al., 1991; Tam et al., 2000; Kowalczyk and Sandberg, 2001; Novák et al., 2012); <i>Ceratopteris richardii</i> (Sztejn et al., 1999); <i>Citrus sinensis</i> (Chamarro et al., 2001); <i>Cucumis sativus</i> (Purves and Hollenberg, 1982; Sonner and Purves, 1985); <i>Dalbergia dolichopetala</i> (Monteiro et al., 1988); <i>Daucus carota</i> (Sasaki et al., 1994); Douglas fir (Chiwocha and von Aderkas, 2002); <i>Glycine max</i> (Cohen, 1982); <i>Heracleum laciniatum</i> (Cohen and Ernstsen, 1991); <i>Oryza sativa</i> (Kojima et al., 2009); <i>Pinus pinea</i> (Riov and Gottlieb, 1980); <i>Pisum sativum</i> (Andraea and Good, 1955); <i>Populus tremula</i> x <i>Populus tremuloides</i> (Tuominen et al., 1994); Tobacco (Sitbon et al., 1993); <i>Triticum aestivum</i> (Martens and Franckenbeger, 1994); <i>Vigna radiata</i> (Norcini and Heuser, 1988) |
| IAA–Glu                               | Inactivation         | <i>Arabidopsis thaliana</i> (Östin et al., 1998; Tam et al., 2000; Kowalczyk and Sandberg, 2001; Novák et al., 2012); <i>Citrus sinensis</i> (Chamarro et al., 2001); <i>Cucumis sativus</i> (Purves and Hollenberg, 1982; Sonner and Purves, 1985); Tobacco (Sitbon et al., 1993)                                                                                                                                                                                                                                                                                                                                                                                                                                                                                                                                                                                                                                    |
| IAA–Gly                               | Unknown              | <i>Helleborus niger</i> (Penčík et al., 2009)                                                                                                                                                                                                                                                                                                                                                                                                                                                                                                                                                                                                                                                                                                                                                                                                                                                                         |
| IAA–Gln                               | Unknown              | <i>Arabidopsis thaliana</i> (Barratt et al., 1999)                                                                                                                                                                                                                                                                                                                                                                                                                                                                                                                                                                                                                                                                                                                                                                                                                                                                    |
| IAA–Leu                               | Storage              | <i>Arabidopsis thaliana</i> (Kowalczyk and Sandberg, 2001); <i>Ceratopteris richardii</i> (Sztejn et al., 1999); <i>Nitella</i> (Sztejn et al., 2000); <i>Physcomitrella patens</i> (Ludwig-Müller et al., 2009)                                                                                                                                                                                                                                                                                                                                                                                                                                                                                                                                                                                                                                                                                                      |
| IAA–Phe                               | Unknown              | Postulated: <i>Arabidopsis thaliana</i> (Kai et al., 2007); <i>Funaria hydrometrica</i> (Sztejn et al., 1999); <i>Helleborus niger</i> (Penčík et al., 2009); <i>Orthotrichum lyellii</i> (Sztejn et al., 1999); <i>Oryza sativa</i> (Kojima et al., 2009)                                                                                                                                                                                                                                                                                                                                                                                                                                                                                                                                                                                                                                                            |
| IAA–Trp                               | Antagonist           | <i>Arabidopsis thaliana</i> (Staswick, 2009)                                                                                                                                                                                                                                                                                                                                                                                                                                                                                                                                                                                                                                                                                                                                                                                                                                                                          |

| Modified auxin form            | Purpose           | Species in which identified (reference)                                                                                                                                                                                                                                                                                                                                                                                                                                                |
|--------------------------------|-------------------|----------------------------------------------------------------------------------------------------------------------------------------------------------------------------------------------------------------------------------------------------------------------------------------------------------------------------------------------------------------------------------------------------------------------------------------------------------------------------------------|
| IAA–Val                        | Unknown           | Postulated: <i>Arabidopsis thaliana</i> (Kai et al., 2007); <i>Funaria hydrometrica</i> (Sztejn et al., 1999); <i>Helleborus niger</i> (Peňčík et al., 2009); <i>Marchantia polymorpha</i> (Sztejn et al., 1999); <i>Pallavicinia lyellii</i> (Sztejn et al., 1999); <i>Phaeoceros laevis</i> (Sztejn et al., 2000); <i>Physcomitrella patens</i> (Ludwig-Müller et al., 2009); <i>Polytrichum ohioense</i> (Sztejn et al., 1999); <i>Reboulia hemisphaerica</i> (Sztejn et al., 1999) |
| Oxindole-3-acetic acid (oxIAA) | Inactivation      | <i>Arabidopsis thaliana</i> (Östin et al., 1998; Kowalczyk and Sandberg, 2001; Novák et al., 2012); <i>Citrus sinensis</i> (Chamarro et al., 2001); <i>Lycopersicon esculentum</i> (Riov and Bangerth, 1992); <i>Marchantia polymorpha</i> (Sztejn et al., 1999); <i>Phaeoceros laevis</i> (Sztejn et al., 2000); <i>Pinus sylvestris</i> (Ernstsen et al., 1987); <i>Vicia faba</i> (Tsurumi and Wada, 1980); <i>Zea mays</i> (Reinecke and Bandurski, 1983)                          |
| IAA–peptide/IAA–protein        |                   | <i>Arabidopsis thaliana</i> (Walz et al., 2002); Postulated: <i>Avena sativa</i> (Percival and Bandurski, 1976); <i>Fragaria vesca</i> (Park et al., 2006); <i>Phaseolus vulgaris</i> (Bialek and Cohen, 1986)                                                                                                                                                                                                                                                                         |
| Indolepropionic acid (IPrA)    | Precursor/storage | Banana (Yan et al., 2012); <i>Chorella vulgaris</i> (Lu et al., 2010); <i>Curcubita pepo</i> (Segal and Wightman, 1982); <i>Lycopersicon esculentum</i> (Aung, 1972); <i>Nicotiana glauca</i> (Bayer, 1969); <i>Nicotiana langsdorffii</i> (Bayer, 1969); <i>Pisum sativum</i> (Schneider et al., 1985); <i>Zea mays</i> (García Sánchez et al., 1996)                                                                                                                                 |

auxin levels (Stepanova et al., 2008). Additionally, *tir2* mutants, defective in *TAA1*, display decreased temperature-dependent hypocotyl elongation, gravitropism, root hair formation, and lateral root development (Yamada et al., 2009). The *wei8-1 tar2-1* double mutant accumulates less IPyA (Mashiguchi et al., 2011) and less IAA (Stepanova et al.,

2008; Tao et al., 2008) than wild type, whereas TAA1 over-expression lines accumulate more IPyA (Mashiguchi et al., 2011) than wild type, consistent with roles for TAA enzymes in converting Trp to IPyA in an auxin biosynthesis pathway.

YUC enzymes convert IPyA to IAA. YUC was previously thought to converge on the IAOx pathway; however,

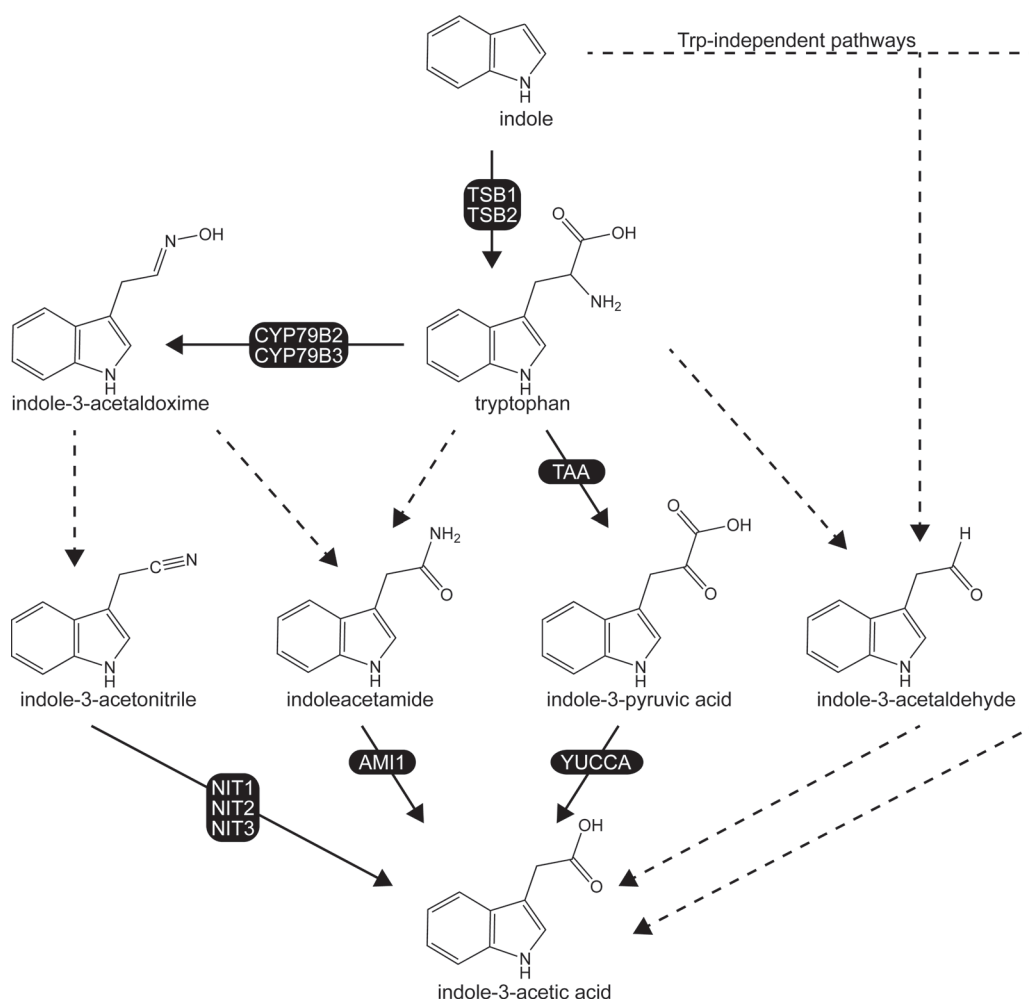

**Fig. 2.** Potential IAA biosynthetic pathways. Arrows in pathways for which enzymes have been identified are solid and arrows in pathways that have not been identified are dashed and may be single or multiple steps.



phenotypic similarities between *yucca* and *taa1* mutants raised the possibility that YUC and TAA1 act in the same pathway (Strader and Bartel, 2008), and non-additive phenotypes of *vanishing tassel2* (*vt2*) and *sparse inflorescence1* (*spi1*), maize homologues of TAA1 and YUC, respectively, support the possibility that TAA1 and YUC are in the same pathway (Phillips *et al.*, 2011). Further, the role of *N*-hydroxytryptamine, a proposed product of YUC enzymatic activity (Zhao *et al.*, 2001), has been called into question (Tivendale *et al.*, 2010). The YUC family is now known to convert IPyA into active IAA (Mashiguchi *et al.*, 2011; Stepanova *et al.*, 2011; Won *et al.*, 2011) using NADPH and oxygen in the conversion process (Dai *et al.*, 2013).

Overexpression of many YUC family members results in auxin overproduction phenotypes (Zhao *et al.*, 2001; Marsch-Martinez *et al.*, 2002; Woodward *et al.*, 2005; Cheng *et al.*, 2006; Kim *et al.*, 2007; Mashiguchi *et al.*, 2011). Higher-order *yuc* mutants have defects in floral patterning and vascular formation, and display decreased DR5-GUS activity (Cheng *et al.*, 2006) and the *yuc1 yuc4 yuc10 yuc11* quadruple mutant does not develop a hypocotyl or a root meristem (Cheng *et al.*, 2007). The *yuc1 yuc2 yuc4 yuc6* mutants hyperaccumulate IPyA whereas YUC6 overexpression lines hypoaccumulate IPyA (Mashiguchi *et al.*, 2011), consistent with roles for YUC family members in converting IPyA to IAA. Because overexpression of YUC family members results in auxin overproduction phenotypes (Zhao *et al.*, 2001; Marsch-Martinez *et al.*, 2002; Woodward *et al.*, 2005; Cheng *et al.*, 2006; Kim *et al.*, 2007; Mashiguchi *et al.*, 2011) and TAA1 overexpression lines resemble wild type (Tao *et al.*, 2008; Mashiguchi *et al.*, 2011), YUC is likely the rate-limiting step of the IPyA pathway.

Interestingly, IAAld has been identified in several plant species (Table 1) and has previously been hypothesized to be an auxin precursor (Seo *et al.*, 1998) and included as an intermediate in many previously proposed auxin biosynthetic pathways (reviewed by Woodward and Bartel, 2005). In addition, IAAld application results in increased free IAA levels (Larsen, 1949, 1951; Bower *et al.*, 1978; Koshiba *et al.*, 1996; Tsurusaki *et al.*, 1997), consistent with the possibility that IAAld is directly converted to IAA *in planta*. The ARABIDOPSIS ALDEHYDE OXIDASE1 (AAO1) enzyme has been suggested to convert IAAld into IAA (Seo *et al.*, 1998). However, roles for AAO1 in IAAld conversion to IAA have been questioned, because the *aba3* mutant, which fails to produce the molybdenum cofactor required for AAO activity (Schwartz *et al.*, 1997), displays no obvious auxin-related defects and does not hyperaccumulate IAAld (Mashiguchi *et al.*, 2011), suggesting that AAO members do not contribute to regulation of auxin homeostasis or regulation of IAAld-to-IAA conversion. At this time, IAAld is not hypothesized to be an intermediate in proposed auxin biosynthesis pathways, despite its natural occurrence and despite *in planta* conversion of supplied IAAld to IAA. Therefore, IAAld is an orphan intermediate in the currently proposed IAA biosynthetic pathways (Fig. 2); future studies will be necessary to identify enzymes required for IAAld-to-IAA conversion and to determine whether IAAld plays a role in auxin homeostasis through either the Trp-dependent or Trp-independent auxin biosynthetic pathways.

### The Trp-independent pathway

In addition to the described Trp-dependent auxin biosynthetic pathways, Trp-independent auxin biosynthetic pathways might also contribute to auxin homeostasis (reviewed by Normanly *et al.*, 2004). Analysis of *trp* mutants in *Arabidopsis* and maize has revealed no differences in free IAA levels when compared with wild type (Wright *et al.*, 1991; Normanly *et al.*, 1993), consistent with the possibility that IAA can be synthesized in the absence of Trp. In addition, Trp-deficient mutants in both *Arabidopsis* and maize accumulate amide- and ester-linked IAA conjugates (reviewed by Normanly *et al.*, 2004; Woodward and Bartel, 2005). Furthermore, feeding assays with labelled Trp precursors support Trp-independent auxin biosynthesis (Normanly *et al.*, 1993). Little is known about potential intermediates in the proposed Trp-independent pathway, and none of the genes involved has been identified; the Trp-independent pathway is postulated to stem from either indole or indole-3-glycerol phosphate (Ouyang *et al.*, 2000).

Some studies have questioned the likelihood of a Trp-independent pathway. Non-enzymatic conversion of indole-3-glycerol phosphate, which hyperaccumulates in the *trp3-1* mutant of *Arabidopsis*, to IAA during extraction has been suggested to be the source of IAA in samples examined for auxin levels (Müller and Weiler, 2000). In addition, Trp is efficiently converted to IAA in maize kernels and is not competed by indole, suggesting that Trp-to-IAA conversion is the main driver of auxin homeostasis in these tissues (Glawischnig *et al.*, 2000). The molecular identification of enzymes required for Trp-independent IAA biosynthesis would clarify these differences.

### 4-Cl-IAA

Halogenated indole acetic acids are bioactive molecules and occur naturally in at least some higher plants. Specifically, the activity of endogenous 4-Cl-IAA has been studied in *Pisum sativum*, as well as multiple other legumes (reviewed by Reinecke, 1999). Although 4-Cl-IAA has yet to be found in *Arabidopsis*, it is an active auxin in *Arabidopsis* bioassays (reviewed by Reinecke, 1999). 4-Cl-IAA is likely synthesized through the IPyA biosynthetic pathway, e.g. chlorination of Trp, conversion to 4-chloroindole-3-pyruvic acid, followed by oxidation to 4-Cl-IAA (Tivendale *et al.*, 2012). Further analysis of the activities and potential storage forms of 4-Cl-IAA will shed light on its importance in auxin homeostasis.

### PAA

PAA is a non-indolic, active endogenous auxin present at physiologically relevant levels in multiple higher plant species (Table 1). In addition to acting as an active auxin, PAA inhibits polar auxin transport in *P. sativum*, potentially regulating the effects of the free IAA (Morris and Johnson, 1987). The biological significance of PAA, however, is not completely understood. Future studies will contribute to understanding the physiological roles of PAA.



has been known for decades, the complex dynamics of this system are not yet fully understood, and whether any of these compounds act independently of conversion to IAA is under debate. Analysis of auxin conjugate composition profiles and examination of mutant plants deficient in different aspects of auxin homeostasis has allowed a more detailed understanding of the purposes and functions of inactive auxins.

### Auxin conjugates

Three major forms of auxin conjugates exist in higher plants, including ester-linked simple and complex carbohydrate conjugates, amide-linked amino acid conjugates, and amide-linked peptide and protein conjugates (reviewed by Ludwig-Müller, 2011). Auxin conjugate forms are generally considered inactive; any observed auxin activity is attributed to conjugate hydrolysis for conversion to an active auxin (reviewed by Woodward and Bartel, 2005; Bajguz and Piotrowska, 2009; Ludwig-Müller, 2011). Interestingly, the composition of IAA conjugates varies between plant species. For example, the major conjugate form in maize kernels is ester-linked sugars (Bandurski *et al.*, 1995), whereas *Arabidopsis* and many other dicots primarily store IAA as amide-linked amino acid conjugates (reviewed by Bajguz and Piotrowska, 2009).

Ester-linked IAA-sugar conjugates have been identified in both monocots and dicots (Table 1). IAA-sugar conjugates can serve roles in auxin storage and in IAA inactivation (see below). UDP glucosyltransferases, such as UGT84B1 in *Arabidopsis* (Jackson *et al.*, 2001) and iaglu in maize (Szczeszen *et al.*, 1994), conjugate IAA to glucose. Further conversion of IAA-Glc to IAA-*myo*-inositol in maize kernels occurs through the reversible activity of 1-*O*-(indole-3-acetyl)-glucose: *myo*-inositol indoleacetyl transferase (IAInos synthase), a serine carboxypeptidase-like acyltransferase that may also catalyse the hydrolysis of IAA-*myo*-inositol to generate free IAA (Kowalczyk *et al.*, 2003). Additionally, maize tissues can hydrolyze IAA-glucose isomers and IAA-*myo*-inositol to free IAA (Jakubowska and Kowalczyk, 2005), consistent with the possibility that hydrolysis of these compounds contributes to the bioactive auxin pool.

Many different amide-linked IAA-amino acid conjugates have been identified in higher plants (Table 1). Of these conjugates, the activity and function of IAA-Ala, IAA-Leu, IAA-Asp, IAA-Glu, and IAA-Trp are best understood. IAA-Ala and IAA-Leu both inhibit root elongation and are readily hydrolysable in *Arabidopsis* (Bartel and Fink, 1995; LeClere *et al.*, 2002; Rampey *et al.*, 2004), suggesting both IAA-Ala and IAA-Leu contribute to the active auxin pool in *Arabidopsis*. Conversely, IAA-Asp and IAA-Glu are not appreciably hydrolysed in *Arabidopsis* (Östin *et al.*, 1998; LeClere *et al.*, 2002; Rampey *et al.*, 2004) and are more likely intermediates in IAA catabolism (see Auxin inactivation pathways). Interestingly, IAA-Trp functions as an inhibitor of auxin-induced growth (Staswick, 2009). Although IAA-Asp is generally thought to be inactive, *Medicago truncatula* hydrolases readily hydrolyse IAA-Asp to free IAA (Campanella *et al.*, 2008), suggesting that different IAA-amino acid conjugates may play alternative

roles in different species. The distinct functions of these IAA-amino acid conjugates are consistent with the complexity and tight regulation of auxin homeostasis. Further work to unravel the importance of each conjugate is likely to lead to a more refined understanding of the contributions of each of these modified auxin forms to auxin homeostasis.

Investigation of IAA-amino acid conjugation enzymes has yielded a wealth of molecular data over the past decade. Group II of the GRETCHEN HAGEN3 (GH3) family of acyl amido synthetases conjugates IAA to amino acids (Westfall *et al.*, 2010). Recent crystal structures of IAA- and jasmonic acid-conjugating GH3 proteins (Peat *et al.*, 2012; Westfall *et al.*, 2012) and IAA-amino acid hydrolase proteins (Bitto *et al.*, 2009) have provided valuable insights into the molecular mechanism of phytohormone-amino acid conjugation and hydrolysis. Mutation of *GH3.1*, *GH3.2*, *GH3.5*, or *GH3.17* in *Arabidopsis* results in mildly increased sensitivity to IAA root elongation inhibition (Staswick *et al.*, 2005), and mutation of *GH3-1* or *GH3-2* in *Physcomitrella patens* results in mildly increased sensitivity to IAA in gametophore growth (Ludwig-Müller *et al.*, 2009). Further research may reveal whether GH3 enzymes have tissue-specific or developmental roles; understanding these roles may require the generation of higher-order mutants. The recent influx of biochemical data describing the action of IAA-conjugating proteins is an important and major step towards understanding the biochemical details of IAA homeostasis.

Several enzymes hydrolyse IAA-amino acid conjugates to free IAA: IAA-LEUCINE RESISTANT1 (ILR1; Bartel and Fink, 1995), ILR1 homologues, ILR1-LIKE1 (ILL1), ILL2 (Bartel and Fink, 1995; LeClere *et al.*, 2002), IAA-ALANINE RESISTANT3 (IAR3), ILL3, and ILL5 (Davies *et al.*, 1999). Mutant screens have also uncovered additional components necessary for IAA-amino acid conjugation, including transcription factors and metal transporters (Campanella *et al.*, 1996; Lasswell *et al.*, 2000; LeClere *et al.*, 2004; Rampey *et al.*, 2006; Rampey *et al.*, 2013). Interestingly, examined *Arabidopsis* conjugate hydrolases display a high affinity for IAA-Leu and IAA-Ala and a low affinity for other IAA-amino acid conjugates (LeClere *et al.*, 2002; Rampey *et al.*, 2004), suggesting that IAA-Leu and IAA-Ala are hydrolysable and contribute to the pool of free, bioactive auxin, whereas other conjugates may serve other functions, such as auxin catabolism (Östin *et al.*, 1998; Rampey *et al.*, 2004). The triple *ilr1 iar3 ill2* IAA-amino acid hydrolase mutant displays decreased light-grown hypocotyl elongation (Rampey *et al.*, 2004), decreased lateral root production (Rampey *et al.*, 2004), and decreased root hair elongation (Strader *et al.*, 2010), along with decreased IAA accumulation and increased IAA-Leu and IAA-Ala accumulation (Rampey *et al.*, 2004). The *ilr1 iar3 ill2* mutant does not display elevated IAA-Asp or IAA-Glu levels (Rampey *et al.*, 2004), suggesting that IAA-Asp and IAA-Glu may be involved in IAA degradation, rather than serving as storage forms.

In addition to auxin-amino acid conjugates, high-molecular-weight auxin conjugates, such as IAA-polypeptide conjugates, have been identified. The first evidence of peptide-linked IAA was uncovered in the form of a 3.6 kDa peptide



from *Phaseolus vulgaris* covalently modified with IAA (Bialek and Cohen, 1986). IAA–PROTEIN CONJUGATE1, a protein related to a soybean seed maturation protein, is modified by IAA in a species-specific manner (Walz *et al.*, 2002) and IAA–protein conjugates have been identified in strawberry (Park *et al.*, 2006) and pea (Park *et al.*, 2010). This evidence collectively suggests that IAA–protein conjugates may exist either as a means of auxin storage or as a novel means of post-translationally influencing protein function or stability.

### IBA and IBA conjugates

IBA is a naturally occurring auxin precursor in many plant species (Table 1) and, intriguingly, is transported independently of IAA (Rashotte *et al.*, 2003; Strader *et al.*, 2008; Strader and Bartel, 2009, 2011; Růžička *et al.*, 2010). The side chain in the 3 position on the indole ring of IBA contains four, rather than two, carbons. IBA-to-IAA conversion occurs in the peroxisome (Zolman *et al.*, 2000; Strader *et al.*, 2010). Several peroxisomal enzymes, including INDOLE-3-BUTYRIC ACID RESPONSE1 (IBR1; Zolman *et al.*, 2008), IBR3 (Zolman *et al.*, 2007), IBR10 (Zolman *et al.*, 2008), and ENOYL-COA HYDRATASE2 (ECH2; Strader *et al.*, 2011) appear to be dedicated to IBA  $\beta$ -oxidation (Fig. 3). Higher-order mutants deficient in IBA-to-IAA conversion display decreased IAA levels, small cotyledons, decreased root hair expansion, reduced apical hook curvature, decreased lateral root production, smaller root meristems, and delayed development (Zolman *et al.*, 2008; Strader *et al.*, 2010, 2011), which suggests that IBA-derived IAA is important for seedling growth and development in *Arabidopsis*. Additionally, the compound naxillin can be used to stimulate IBA-to-IAA conversion to drive lateral root initiation without affecting general auxin responses (De Rybel *et al.*, 2012), consistent with important roles for IBA-derived auxin in lateral root formation. Coupled with evidence that IAA is converted to IBA via the action of an unidentified IBA synthase (Ludwig-Müller and Epstein, 1994), these data indicate IBA is a significant storage form of auxin integral to plant growth and development.

Similar to IAA, IBA also exists in both amide and ester-linked conjugate forms (reviewed by Woodward and Bartel, 2005; Bajguz and Piotrowska, 2009; Ludwig-Müller, 2011). The purpose of IBA–amino acid conjugates, however, has not yet been elucidated. The wheat hydrolase TaIAR3 displays a high affinity for IBA–Ala and IBA–Gly without hydrolysing IAA–Ala or IAA–Gly (Campanella *et al.*, 2004) and the *Brassica rapa* hydrolases BrIAR3 and BrILL2 display a higher affinity for IPrA–Ala and IBA–Ala than for IAA–Ala (Savić *et al.*, 2009), consistent with the possibility that IBA–amino acid conjugates can serve as a storage form of auxin. In addition, UGT74E2 catalyses the formation of IBA–glucose in response to oxidative stress, and overexpression of UGT74E2 results in elevated IBA–Glu levels, increased shoot branching, and heightened tolerance to both drought and salt stresses (Tognetti *et al.*, 2010), suggesting that roles for IBA are not confined to the seedling state. Further investigation of the physiological importance and enzymes responsible for

the production of IBA conjugates will be necessary to understand IBA functions.

### MeIAA

In addition to conjugation to biomolecules, IAA can be converted to its methyl ester form, MeIAA. Conversion to MeIAA, likely by IAA CARBOXYMETHYLTRANSFERASE1 (IAMT1) in *Arabidopsis* (Zubieta *et al.*, 2003; Qin *et al.*, 2005), results in a non-polar modified auxin that is probably capable of transporter-independent movement (Li *et al.*, 2008; Yang *et al.*, 2008). Indeed, application of MeIAA to the *aux1* transport mutant results in partial rescue of the *aux1* mutant phenotype, thus implying a transporter-independent mechanism of MeIAA movement (Li *et al.*, 2008). However, the MeIAA molecule does not itself possess auxin activity (Li *et al.*, 2008; Yang *et al.*, 2008) and must be converted to IAA through the activities of a family of methyl esterases (Yang *et al.*, 2008).

Overexpression of *IAMT1* results in decreased IAA responsiveness and agravitropic growth, whereas *IAMT1* RNAi lines display leaf epinasty, decreased stature, and decreased fertility (Qin *et al.*, 2005), consistent with roles for IAMT1 in regulating auxin homeostasis. Conversely, *METHYL ESTERASE17* (*MES17*) insertional mutants display decreased sensitivity to MeIAA, remain sensitive to free IAA, and have increased hypocotyl elongation (Yang *et al.*, 2008). Overexpression of *MES17* results in hypersensitivity to MeIAA but not to IAA (Yang *et al.*, 2008). Although key players have been identified to suggest the roles of MeIAA in auxin homeostasis and mutant phenotypes suggest roles for MeIAA-derived auxin in various aspects of development, the extent to which MeIAA contributes to auxin homeostasis is not yet known.

## Auxin inactivation pathways

Many auxin storage forms can be converted back to the active auxin IAA. However, some storage forms appear to comprise an IAA inactivation pathway and cannot be converted back to active IAA (Fig. 4). These modified auxin forms are hypothesized to protect against auxin toxicity in the presence of excess auxin (Cohen and Bandurski, 1982; Woodward and Bartel, 2005). Auxin detoxification is carried out via an IAA catabolic pathway for irreversible modification of IAA.

### Auxin conjugates

Ester-linked IAA–sugar conjugates can serve roles in both auxin storage and IAA inactivation (reviewed by Woodward and Bartel, 2005). Although IAA–sugar conjugates can be hydrolysed to free IAA (see above), plants overexpressing *UGT84B1* accumulate high levels of 1-*O*-IAGlc, are resistant to exogenous IAA, and are impaired in gravitropism (Jackson *et al.*, 2002), consistent with a potential role for glycosylation in IAA inactivation.



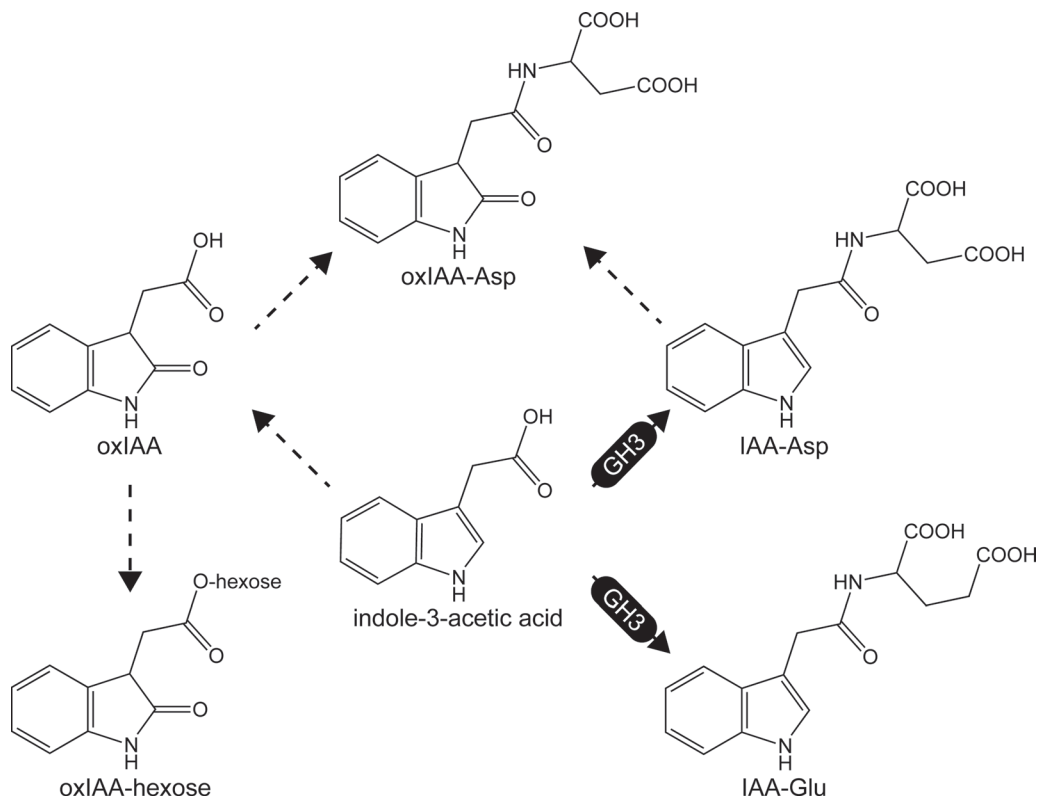

**Fig. 4.** Potential IAA inactivation pathways. Arrows in pathways for which enzymes have been identified are solid and arrows in pathways that have not been identified are dashed and may be single or multiple steps.

IAA–Asp and IAA–Glu accumulate at very low levels (<3% of all auxin levels) under normal growth conditions (Tam *et al.*, 2000) and rapidly increase upon auxin application (Östin *et al.*, 1998; Barratt *et al.*, 1999). Neither IAA–Asp nor IAA–Glu are well hydrolysed by amidohydrolases (reviewed by Ljung *et al.*, 2002), consistent with roles in IAA inactivation. Most IAA-specific GH3 proteins (across multiple species) are capable of conjugation of IAA to Asp and/or Glu (Staswick *et al.*, 2005; Westfall *et al.*, 2010; Böttcher *et al.*, 2011; Peat *et al.*, 2012), suggesting a bias toward auxin inactivation over creating hydrolysable auxin conjugates. Additionally, overexpression of GH3-6 (*dfl1-D* mutant plants), an amidosynthetase that generates IAA–Asp (Staswick *et al.*, 2005), results in dwarf plants with low auxin phenotypes (Nakazawa *et al.*, 2001).

#### Oxindole-3-acetic acid (oxIAA)

Inactivation of IAA occurs via the irreversible oxidation to oxIAA, the first precursor in the pathway responsible for catabolism of IAA (reviewed by Woodward and Bartel, 2005). The rapid accumulation of oxIAA after treatment with IAA (Östin *et al.*, 1998) suggests that oxIAA plays an important role in regulating bioactive auxin levels, and oxIAA and oxIAA derivatives have been identified in a number of species (Table 1). Further modification of oxIAA to di-oxIAA, oxIAA–hexose, oxIAA–sugar, oxIAA–Asp, oxIAA–Glu, di-oxIAA–Asp, or (di-)oxIAA–Asp/Glu–sugar are proposed next steps in the oxIAA non-decarboxylative catabolic

pathway (Östin *et al.*, 1998; Ljung *et al.*, 2002; Kai *et al.*, 2007). In addition, IAA–Asp can be oxidized to oxIAA–Asp or di-oxIAA–Asp directly in many examined species (reviewed by Ljung *et al.*, 2002; Normanly, 2010). Future research on how IAA and IAA conjugates are oxidized and how the plant recycles these oxIAA molecules will deepen our understanding of auxin metabolism.

#### Future directions

Regulation of bioactive auxin levels is clearly complex and many questions about auxin biosynthesis and modified auxin forms remain unanswered. Chief among these questions is how the plant integrates and regulates local auxin biosynthesis, the generation of storage forms, release from storage forms, and transport to contribute to the generation and maintenance of auxin gradients. Understanding transcriptional regulation of auxin biosynthesis genes and the post-translational control of activity may provide some tools to answer these questions.

#### Acknowledgements

We thank Lauren Gunther, Eric Hamilton, Marta Michniewicz-Paciorek, Julie Thole, and Corey Westfall for critical comments on the manuscript and helpful discussion. This work was supported by the National Institutes of Health (R00 GM089987-03 to L.C.S.) and the National

Science Foundation Graduate Research Fellowship Program (2011101911 to D.A.K.).

## References

- Abe H, Uchiyama M, Sato R.** 1974. Isolation of phenylacetic acid and its *p*-hydroxy derivative as auxin-like substances from *Undaria pinnatifida*. *Agricultural and Biological Chemistry* **38**, 897–898.
- Andreae WA, Good NE.** 1955. the formation of indoleacetylaspatic acid in pea seedlings. *Plant Physiology* **30**, 380–382.
- Aung LH.** 1972. The nature of root-promoting substances in *Lycopersicon esculentum* seedlings. *Physiologia Plantarum* **26**, 306–309.
- Badenoch-Jones J, Summons RE, Rolfe BG, Letham DS.** 1984. Phytohormones, *Rhizobium* mutants, and nodulation in legumes. IV. Auxin metabolites in pea root nodules. *Journal of Plant Growth Regulation* **3**, 23–39.
- Bajguz A, Piotrowska A.** 2009. Conjugates of auxin and cytokinin. *Phytochemistry* **70**, 957–969.
- Bak S, Nielsen HL, Halkier BA.** 1998. The presence of CYP79 homologues in glucosinolate-producing plants shows evolutionary conservation of the enzymes in the conversion of amino acid to aldoxime in the biosynthesis of cyanogenic glucosides and glucosinolates. *Plant Molecular Biology* **38**, 725–734.
- Bak S, Tax FE, Feldmann KA, Galbraith DW, Feyereisen R.** 2001. CYP83B1, a cytochrome P450 at the metabolic branch point in auxin and indole glucosinolate biosynthesis in *Arabidopsis*. *Plant Cell* **13**, 101–111.
- Bandurski RS, Cohen JD, Slovin JP, Reinecke DM.** 1995. Auxin biosynthesis and metabolism. In Davies PJ, ed. *Plant Hormones*. Dordrecht: Kluwer Academic Publishers, 39–65.
- Barkawi LS, Tam YY, Tillman JA, Pederson B, Calio J, Al-Amier H, Emerick M, Normanly J, Cohen JD.** 2008. A high-throughput method for the quantitative analysis of indole-3-acetic acid and other auxins from plant tissue. *Analytical Biochemistry* **372**, 177–188.
- Barratt NM, Dong W, Gage DA, Magnus V, Town CD.** 1999. Metabolism of exogenous auxin by *Arabidopsis thaliana*: identification of the conjugate  $N_{\alpha}$ -(indol-3-ylacetyl)-glutamine and initiation of a mutant screen. *Physiologia Plantarum* **105**, 207–217.
- Bartel B, Fink GR.** 1995. ILR1, an amidohydrolase that releases active indole-3-acetic acid from conjugates. *Science* **268**, 1745–1748.
- Bayer MH.** 1969. Gas chromatographic analysis of acidic indole auxins in *Nicotiana*. *Plant Physiology* **44**, 267–271.
- Bialek K, Cohen JD.** 1986. Isolation and partial characterization of the major amide-linked conjugate of indole-3-acetic acid from *Phaseolus vulgaris* L. *Plant Physiology* **80**, 99–104.
- Bitto E, Bingman CA, Bittova L, Houston NL, Boston RS, Fox BG, Phillips GN Jr.** 2009. X-ray structure of ILL2, an auxin-conjugate amidohydrolase from *Arabidopsis thaliana*. *Proteins* **74**, 61–71.
- Blommaert K.** 1954. Growth- and inhibiting-substances in relation to the rest period of the potato tuber. *Nature* **174**, 970–972.
- Böttcher C, Boss PK, Davies C.** 2011. Acyl substrate preferences of an IAA-amido synthetase account for variations in grape (*Vitis vinifera* L.) berry ripening caused by different auxinic compounds indicating the importance of auxin conjugation in plant development. *Journal of Experimental Botany* **62**, 4267–4280.
- Bower PJ, Brown HM, Purves WK.** 1978. Cucumber seedling indoleacetaldehyde oxidase. *Plant Physiology* **61**, 107–110.
- Campanella JJ, Ludwig-Müller J, Town CD.** 1996. Isolation and characterization of mutants of *Arabidopsis thaliana* with increased resistance to growth inhibition by indoleacetic acid-amino acid conjugates. *Plant Physiology* **112**, 735–745.
- Campanella JJ, Olajide AF, Magnus V, Ludwig-Müller J.** 2004. A novel auxin conjugate hydrolase from wheat with substrate specificity for longer side-chain auxin amide conjugates. *Plant Physiology* **135**, 2230–2240.
- Campanella JJ, Smith SM, Leibu D, Wexler S, Ludwig-Müller J.** 2008. The auxin conjugate hydrolase family of *Medicago truncatula* and their expression during the interaction with two symbionts. *Journal of Plant Growth Regulation* **27**, 26–38.
- Chamarro J, Östin A, Sandberg G.** 2001. Metabolism of indole-3-acetic acid by orange (*Citrus sinensis*) flavedo tissue during fruit development. *Phytochemistry* **57**, 179–187.
- Cheng Y, Dai X, Zhao Y.** 2006. Auxin biosynthesis by the YUCCA flavin monooxygenases controls the formation of floral organs and vascular tissues in *Arabidopsis*. *Genes & Development* **20**, 1790–1799.
- Cheng Y, Dai X, Zhao Y.** 2007. Auxin synthesized by the YUCCA flavin monooxygenases is essential for embryogenesis and leaf formation in *Arabidopsis*. *Plant Cell* **19**, 2430–2439.
- Chisnell JR.** 1984. Myo-inositol esters of indole-3-acetic acid are endogenous components of *Zea mays* L. shoot tissue. *Plant Physiology* **74**, 278–283.
- Chiwocha S, von Aderkas P.** 2002. Endogenous levels of free and conjugated forms of auxin, cytokinins and abscisic acid during seed development in Douglas fir. *Plant Growth Regulation* **36**, 191–200.
- Cohen JD.** 1982. Identification and quantitative analysis of indole-3-acetyl-L-aspartate from seeds of *Glycine max* L. *Plant Physiology* **70**, 749–753.
- Cohen JD, Bandurski RS.** 1982. Chemistry and physiology of the bound auxins. *Annual Review of Plant Physiology* **33**, 403–430.
- Cohen JD, Ernstsens A.** 1991. Indole-3-acetic acid and indole-3-acetylaspatic acid isolated from seeds of *Heracleum laciniatum* Horn. *Plant Growth Regulation* **10**, 95–101.
- Cooney TP, Nonhebel HM.** 1989. The measurement and mass spectral identification of indole-3-pyruvate from tomato shoots. *Biochemical and Biophysical Research Communications* **162**, 761–796.
- Dai X, Mashiguchi K, Chen Q, Kasahara H, Kamiya Y, Ojha S, Dubois J, Ballou D, Zhao Y.** 2013. The biochemical mechanism of auxin biosynthesis by an *Arabidopsis* YUCCA flavin-containing monooxygenase. *Journal of Biological Chemistry* **288**, 1448–1457.
- Davies RT, Goetz DH, Lasswell J, Anderson MN, Bartel B.** 1999. *IAR3* encodes an auxin conjugate hydrolase from *Arabidopsis*. *Plant Cell* **11**, 365–376.
- De Rybel B, Audenaert D, Xuan W, et al..** 2012. A role for the root cap in root branching revealed by the non-auxin probe naxillin. *Nature Chemical Biology* **8**, 798–805.

- Engvild KC, Egsgaard H, Larsen E.** 1980. Determination of 4-chloroindole-3-acetic acid methyl ester in *Lathyrus*, *Vicia* and *Pisum* by gas chromatography-mass spectrometry. *Physiologia Plantarum* **48**, 499–503.
- Engvild KC, Egsgaard H, Larsen E.** 1981. Determination of 4-chloroindoleacetic acid methyl ester in Viciaeae species by gas chromatography-mass spectrometry. *Physiologia Plantarum* **53**, 79–81.
- Epstein E, Chen KH., Cohen JD.** 1989. Identification of indole-3-butyric acid as an endogenous constituent of maize kernels and leaves. *Plant Growth Regulation* **8**, 215–223.
- Epstein E, Nissen SJ, Sutter EG.** 1991. Indole-3-acetic acid and indole-3-butyric acid in tissues of carrot inoculated with *Agrobacterium rhizogenes*. *Journal of Plant Growth Regulation* **10**, 97–100.
- Ernstsen A, Sandberg G.** 1986. Identification of 4-chloroindole-3-acetic acid and indole-3-aldehyde in seeds of *Pinus sylvestris*. *Physiologia Plantarum* **68**, 511–518.
- Ernstsen A, Sandberg G, Lundström K.** 1987. Identification of oxindole-3-acetic acid, and metabolic conversion of indole-3-acetic acid to oxindole-3-acetic acid in *Pinus sylvestris* seeds. *Planta* **172**, 47–52.
- Fries L, Iwasaki H.** 1976. *p*-Hydroxyphenylacetic acid and other phenolic compounds as growth stimulators of the red alga *Porphyra tenera*. *Plant Science Letters* **6**, 299–307.
- García Sánchez F, Navas Díaz A, García Pareja A.** 1996. Micellar liquid chromatography of plant growth regulators detected by derivative fluorometry. *Journal of Chromatography A* **723**, 227–233.
- Glawischnig E, Tomas A, Eisenreich W, Spiteller P, Bacher A, Gierl A.** 2000. Auxin biosynthesis in maize kernels. *Plant Physiology* **123**, 1109–1119.
- Gouthu S, Morre J, Maier CS, Deluc LG.** 2013. An analytical method to quantify three plant hormone families in grape berry using liquid chromatography and multiple reaction monitoring mass spectrometry. In: Gang DR, ed. *Phytochemicals, Plant Growth, and the Environment*, vol. **42**. New York: Springer Science+Business Media, 19–36.
- Hall PJ.** 1980. Indole-3-acetyl-myo-inositol in kernels of *Oryza sativa*. *Phytochemistry* **19**, 2121–2123.
- Hull AK, Vij R, Celenza JL.** 2000. *Arabidopsis* cytochrome P450s that catalyze the first step of tryptophan-dependent indole-3-acetic acid biosynthesis. *Proceedings of the National Academy of Sciences, USA* **97**, 2379–2384.
- Ilić N, Normanly J, Cohen JD.** 1996. Quantification of free plus conjugated indoleacetic acid in *Arabidopsis* requires correction for the nonenzymatic conversion of indolic nitriles. *Plant Physiology* **111**, 781–788.
- Jackson RG, Kowalczyk M, Li Y, Higgins G, Ross J, Sandberg G, Bowles DJ.** 2002. Over-expression of an *Arabidopsis* gene encoding a glucosyltransferase of indole-3-acetic acid: phenotypic characterization of transgenic lines. *The Plant Journal* **32**, 573–583.
- Jackson RG, Lim EK, Li Y, Kowalczyk M, Sandberg G, Hoggett J, Ashford DA, Bowles DJ.** 2001. Identification and biochemical characterization of an *Arabidopsis* indole-3-acetic acid glucosyltransferase. *Journal of Biological Chemistry* **276**, 4350–4356.
- Jakubowska A, Kowalczyk S.** 2004. The auxin conjugate 1-O-indole-3-acetyl- $\beta$ -D-glucose is synthesized in immature legume seeds by IAGlc synthase and may be used for modification of some high molecular weight compounds. *Journal of Experimental Botany* **55**, 791–801.
- Jakubowska A, Kowalczyk S.** 2005. A specific enzyme hydrolyzing 6-O(4-O)-indole-3-ylacetyl- $\beta$ -D-glucose in immature kernels of *Zea mays*. *Journal of Plant Physiology* **162**, 207–213.
- Jones ERH, Henbest HB, Bentley JA.** 1952. 3-Indolylacetonitrile: a naturally occurring plant growth hormone. *Nature* **169**, 485–487.
- Kai K, Horita J, Wakasa K, Miyagawa H.** 2007. Three oxidative metabolites of indole-3-acetic acid from *Arabidopsis thaliana*. *Phytochemistry* **68**, 1651–1663.
- Kim JI, Sharkhuu A, Jin JB, et al.** 2007. *yucca6*, a dominant mutation in *Arabidopsis*, affects auxin accumulation and auxin-related phenotypes. *Plant Physiology* **145**, 722–735.
- Kojima M, Kamada-Nobusada T, Komatsu H, et al.** 2009. Highly sensitive and high-throughput analysis of plant hormones using MS-probe modification and liquid chromatography-tandem mass spectrometry: an application for hormone profiling in *Oryza sativa*. *Plant and Cell Physiology* **50**, 1201–1214.
- Koshiha T, Saito E, Ono N, Yamamoto N, Sato M.** 1996. Purification and properties of flavin- and molybdenum-containing aldehyde oxidase from coleoptiles of maize. *Plant Physiology* **110**, 781–789.
- Kowalczyk M, Sandberg G.** 2001. Quantitative analysis of indole-3-acetic acid metabolites in *Arabidopsis*. *Plant Physiology* **127**, 1845–1853.
- Kowalczyk S, Jakubowska A, Zielińska E, Bandurski RS.** 2003. Bifunctional indole-3-acetyl transferase catalyses synthesis and hydrolysis of indole-3-acetyl-myo-inositol in immature endosperm of *Zea mays*. *Physiologia Plantarum* **119**, 165–174.
- Larsen P.** 1949. Conversion of indole acetaldehyde to indoleacetic acid in excised coleoptiles and in coleoptile juice. *American Journal of Botany* **36**, 32–41.
- Larsen P.** 1951. Enzymatic conversion of indole acetaldehyde and naphthalene acetaldehyde to auxins. *Plant Physiology* **26**, 697–707.
- Lasswell J, Rogg LE, Nelson DC, Rongey C, Bartel B.** 2000. Cloning and characterization of *IAR1*, a gene required for auxin conjugate sensitivity in *Arabidopsis*. *Plant Cell* **12**, 2395–2408.
- LeClere S, Rampey RA, Bartel B.** 2004. *IAR4*, a gene required for auxin conjugate sensitivity in *Arabidopsis*, encodes a pyruvate dehydrogenase E1 $\alpha$  homolog. *Plant Physiology* **135**, 989–999.
- LeClere S, Tellez R, Rampey RA, Matsuda SPT., Bartel B.** 2002. Characterization of a family of IAA-amino acid conjugate hydrolases from *Arabidopsis*. *Journal of Biological Chemistry* **277**, 20446–20452.
- Li L, Hou X, Tsuge T, Ding M, Aoyama T, Oka A, Gu H, Zhao Y, Qu LJ.** 2008. The possible action mechanisms of indole-3-acetic acid methyl ester in *Arabidopsis*. *Plant Cell Reports* **27**, 575–584.
- Liu X, Hegeman AD, Gardner G, Cohen JD.** 2012. Protocol: high-throughput and quantitative assays of auxin and auxin precursors from minute tissue samples. *Plant Methods* **8**, 31.
- Ljung K, Hull AK, Kowalczyk M, Marchant A, Celenza J, Cohen JD, Sandberg G.** 2002. Biosynthesis, conjugation, catabolism and



homeostasis of indole-3-acetic acid in *Arabidopsis thaliana*. *Plant Molecular Biology* **50**, 309–332.

**Lu Q, Chen L, Lu M, Chen G, Zhang L.** 2010. Extraction and analysis of auxins in plants using dispersive liquid–liquid microextraction followed by high-performance liquid chromatography with fluorescence detection. *Journal of Agricultural and Food Chemistry* **58**, 2763–2770.

**Ludwig-Müller J.** 2011. Auxin conjugates: their role for plant development and in the evolution of land plants. *Journal of Experimental Botany* **62**, 1757–1773.

**Ludwig-Müller J, Cohen JD.** 2002. Identification and quantification of three active auxins in different tissues of *Tropaeolum majus*. *Physiologia Plantarum* **115**, 320–329.

**Ludwig-Müller J, Epstein E.** 1994. Indole-3-butyric acid in *Arabidopsis thaliana*. III. *In vivo* biosynthesis. *Plant Growth Regulation* **14**, 7–14.

**Ludwig-Müller J, Hilgenberg W.** 1988. A plasma membrane-bound enzyme oxidizes L-tryptophan to indole-3-acetaldoxime. *Physiologia Plantarum* **74**, 240–250.

**Ludwig-Müller J, Jülke S, Bierfreund NM, Decker EL, Reski R.** 2009. Moss (*Physcomitrella patens*) GH3 proteins act in auxin homeostasis. *New Phytologist* **181**, 323–338.

**Ludwig-Müller J, Sass S, Sutter EG, Wodner M, Epstein E.** 1993. Indole-3-butyric acid in *Arabidopsis thaliana*. I. Identification and quantification. *Plant Growth Regulation* **13**, 179–187.

**Luo Y, Qin G, Zhang J, et al.** 2011. D-myo-inositol-3-phosphate affects phosphatidylinositol-mediated endomembrane function in *Arabidopsis* and is essential for auxin-regulated embryogenesis. *Plant Cell* **23**, 1352–1372.

**Marsch-Martinez N, Greco R, Van Arkel G, Herrera-Estrella L, Pereira A.** 2002. Activation tagging using the En-I maize transposon system in *Arabidopsis*. *Plant Physiology* **129**, 1544–1556.

**Martens DA, Franckenbeger WT.** 1994. Assimilation of exogenous 2'-<sup>14</sup>C-indole-3-acetic acid and 3'-<sup>14</sup>C-tryptophan exposed to the roots of three wheat varieties. *Plant and Soil* **166**, 281–290.

**Mashiguchi K, Tanaka K, Sakai T, et al.** 2011. The main auxin biosynthesis pathway in *Arabidopsis*. *Proceedings of the National Academy of Sciences, USA* **108**, 18512–18517.

**Mikkelsen MD, Hansen CH, Wittstock U, Halkier BA.** 2000. Cytochrome P450 CYP79B2 from *Arabidopsis* catalyzes the conversion of tryptophan to indole-3-acetaldoxime, a precursor of indole glucosinolates and indole-3-acetic acid. *Journal of Biological Chemistry* **275**, 33712–33717.

**Mikkelsen MD, Naur P, Halkier BA.** 2004. *Arabidopsis* mutants in the C-S lyase of glucosinolate biosynthesis establish a critical role for indole-3-acetaldoxime in auxin homeostasis. *The Plant Journal* **37**, 770–777.

**Monteiro AM, Crozier A, Sandberg G.** 1988. The biosynthesis and conjugation of indole-3-acetic acid in germinating seed and seedlings of *Dalbergia dolichopetala*. *Planta* **174**, 561–568.

**Morris DA, Johnson CF.** 1987. Regulation of auxin transport in pea (*Pisum sativum* L.) by phenylacetic acid: inhibition of polar auxin transport in intact plants and stem segments. *Planta* **172**, 408–416.

**Müller A, Weiler EW.** 2000. Indolic constituents and indole-3-acetic acid biosynthesis in the wild-type and a tryptophan auxotroph mutant of *Arabidopsis thaliana*. *Planta* **211**, 855–863.

**Nakazawa M, Yabe N, Ichikawa T, Yamamoto YY, Yoshizumi T, Hasunuma K, Matsui M.** 2001. *DFL1*, an auxin-responsive GH3 gene homologue, negatively regulates shoot cell elongation and lateral root formation, and positively regulates the light response of hypocotyl length. *The Plant Journal* **25**, 213–221.

**Narasimhan K, Basheer C, Bajic VB, Swarup S.** 2003. Enhancement of plant–microbe interactions using a rhizosphere metabolomics-driven approach and its application in the removal of polychlorinated biphenyls. *Plant Physiology* **132**, 146–153.

**Nicholls PB.** 1967. The isolation of indole-3-acetyl-3-O-myo-inositol from *Zea mays*. *Planta* **10**, 2207–2209.

**Norcini JG, Heuser CW.** 1988. Changes in the level of [<sup>14</sup>C]indole-3-acetic acid and [<sup>14</sup>C]indoleacetylaspartic acid during root formation in mung bean cuttings. *Plant Physiology* **86**, 1236–1239.

**Normanly J.** 2010. Approaching cellular and molecular resolution of auxin biosynthesis and metabolism. *Cold Spring Harbor Perspectives in Biology* **2**, a001594.

**Normanly J, Cohen JD, Fink GR.** 1993. *Arabidopsis thaliana* auxotrophs reveal a tryptophan-independent biosynthetic pathway for indole-3-acetic acid. *Proceedings of the National Academy of Sciences, USA* **90**, 10355–10359.

**Normanly J, Grisafi P, Fink GR, Bartel B.** 1997. *Arabidopsis* mutants resistant to the auxin effects of indole-3-acetonitrile are defective in the nitrilase encoded by the *NIT1* gene. *Plant Cell* **9**, 1781–1790.

**Normanly J, Slovin JP, Cohen JD.** 2004. Auxin biosynthesis and metabolism. In: Davies PJ, ed. *Plant Hormones: Biosynthesis, Signal Transduction, Action*. Dordrecht: Kluwer Academic Publishers, 36–62.

**Novák O, Hényková E, Sairanen I, Kowalczyk M, Pospíšil T, Ljung K.** 2012. Tissue-specific profiling of the *Arabidopsis thaliana* auxin metabolome. *The Plant Journal* **72**, 523–536.

**Okamoto T, Isogai Y, Koizumi T.** 1967. Studies on plant growth regulators. 2. isolation of indole-3-acetic acid phenylacetic acid and several plant growth inhibitors from etiolated seedlings of *Phaseolus*. *Chemical and Pharmaceutical Bulletin* **15**, 159–163.

**Östin A, Kowalczyk M, Bhalerao RP, Sandberg G.** 1998. Metabolism of indole-3-acetic acid in *Arabidopsis*. *Plant Physiology* **118**, 285–296.

**Östin A, Moritz T, Sandberg G.** 1992. Liquid chromatography/mass spectrometry of conjugates and oxidative metabolites of indole-3-acetic acid. *Biological Mass Spectrometry* **21**, 292–298.

**Ouyang J, Shao X, Li J.** 2000. Indole-3-glycerol phosphate, a branchpoint of indole-3-acetic acid biosynthesis from the tryptophan biosynthetic pathway in *Arabidopsis thaliana*. *The Plant Journal* **24**, 327–333.

**Park S, Cohen JD, Slovin JP.** 2006. Strawberry fruit protein with a novel indole-acyl modification. *Planta* **224**, 1015–1022.

**Park S, Ozga JA, Cohen JD, Reinecke DM.** 2010. Evidence of 4-CI-IAA and IAA bound to proteins in pea fruit and seeds. *Journal of Plant Growth Regulation* **28**, 184–193.

**Park WJ, Kriechbaumer V, Müller A, Piotrowski M, Meeley RB, Gierl A, Glawischnig E.** 2003. The nitrilase ZmNIT2 converts



- indole-3-acetonitrile to indole-3-acetic acid. *Plant Physiology* **133**, 794–802.
- Peat TS, Bottcher C, Newman J, Lucent D, Cowieson N, Davies C.** 2012. Crystal structure of an indole-3-acetic acid amido synthetase from grapevine involved in auxin homeostasis. *Plant Cell* **24**, 4525–4538.
- Pedras MS, Nycholat CM, Montaut S, Xu Y, Khan AQ.** 2002. Chemical defenses of crucifers: elicitation and metabolism of phytoalexins and indole-3-acetonitrile in brown mustard and turnip. *Phytochemistry* **59**, 611–625.
- Peňčík A, Rolčík J, Novák O, Magnus V, Barták P, Buchtík R, Salopek-Sondi B, Strnad M.** 2009. Isolation of novel indole-3-acetic acid conjugates by immunoaffinity extraction. *Talanta* **80**, 651–655.
- Percival FW, Bandurski RS.** 1976. Esters of indole-3-acetic acid from *Avena* seeds. *Plant Physiology* **58**, 60–67.
- Phillips KA, Skirpan AL, Liu X, Christensen A, Slewinski TL, Hudson C, Barazesh S, Cohen JD, Malcomber S, McSteen P.** 2011. *vanishing tassel2* encodes a grass-specific tryptophan aminotransferase required for vegetative and reproductive development in maize. *Plant Cell* **23**, 550–566.
- Pollmann S, Müller A, Piotrowski M, Weiler EW.** 2002. Occurrence and formation of indole-3-acetamide in *Arabidopsis thaliana*. *Planta* **216**, 155–161.
- Pollmann S, Neu D, Weiler EW.** 2003. Molecular cloning and characterization of an amidase from *Arabidopsis thaliana* capable of converting indole-3-acetamide into the plant growth hormone, indole-3-acetic acid. *Phytochemistry* **62**, 293–300.
- Purves WK, Hollenberg SM.** 1982. Metabolism of exogenous indoleacetic acid to its amide conjugates in *Cucumis sativus* L. *Plant Physiology* **70**, 283–286.
- Qin G, Gu H, Zhao Y, et al.** 2005. An indole-3-acetic acid carboxyl methyltransferase regulates *Arabidopsis* leaf development. *Plant Cell* **17**, 2693–2704.
- Quittenden LJ, Davies NW, Smith JA, Molesworth PP, Tivendale ND, Ross JJ.** 2009. Auxin biosynthesis in pea: characterization of the tryptamine pathway. *Plant Physiology* **151**, 1130–1138.
- Rajagopal R, Tsurusaki K, Kannangara G, Kuraishi S, Sakurai N.** 1994. Natural occurrence of indoleacetamide and amidohydrolase activity in etiolated aseptically-grown squash seedlings. *Plant and Cell Physiology* **35**, 329–339.
- Rampey RA, LeClere S, Kowalczyk M, Ljung K, Sandberg G, Bartel B.** 2004. A family of auxin-conjugate hydrolases that contributes to free indole-3-acetic acid levels during *Arabidopsis* germination. *Plant Physiology* **135**, 978–988.
- Rampey RA, Woodward AW, Hobbs BN, Tierney MP, Lahner B, Salt DE, Bartel B.** 2006. An *Arabidopsis* basic helix–loop–helix leucine zipper protein modulates metal homeostasis and auxin conjugate responsiveness. *Genetics* **174**, 1841–1857.
- Rampey RA, Baldrige MT, Farrow DC, Bay SN, Bartel B.** 2013. Compensatory mutations in predicted metal transporters modulate auxin conjugate responsiveness in *Arabidopsis*. *G3* **3**, 131–141.
- Rashotte AM, Poupert J, Waddell CS, Muday GK.** 2003. Transport of the two natural auxins, indole-3-butyric acid and indole-3-acetic acid, in *Arabidopsis*. *Plant Physiology* **133**, 761–772.
- Reinecke DM.** 1999. 4-Chloroindole-3-acetic acid and plant growth. *Plant Growth Regulation* **27**, 3–13.
- Reinecke DM, Bandurski RS.** 1983. Oxindole-3-acetic acid, an indole-3-acetic acid catabolite in *Zea mays*. *Plant Physiology* **71**, 211–213.
- Riov J, Bangerth F.** 1992. Metabolism of auxin in tomato fruit tissue: formation of high molecular weight conjugates of oxindole-3-acetic acid via the oxidation of indole-3-acetylaspatic acid. *Plant Physiology* **100**, 1396–1402.
- Riov J, Gottlieb HE.** 1980. Metabolism of auxin in pine tissues: indole-3-acetic acid conjugation. *Physiologia Plantarum* **50**, 347–352.
- Růžička K, Strader LC, Bailly A, et al.** 2010. *Arabidopsis PIS1* encodes the ABCG37 transporter of auxinic compounds including the auxin precursor indole-3-butyric acid. *Proceedings of the National Academy of Sciences, USA* **107**, 10749–10753.
- Sasaki K, Shimomura K, Kamada H, Harada H.** 1994. IAA metabolism in embryogenic and non-embryonic carrot cells. *Plant and Cell Physiology* **35**, 1159–1164.
- Savić B, Tomić S, Magnus V, Gruden K, Barle K, Grenković R, Ludwig-Müller J, Salopek-Sondi B.** 2009. Auxin amidohydrolases from *Brassica rapa* cleave the alanine conjugate of indolepropionic acid as a preferable substrate: a biochemical and modeling approach. *Plant and Cell Physiology* **50**, 1587–1599.
- Schmidt RC, Müller A, Hain R, Bartling D, Weiler EW.** 1996. Transgenic tobacco plants expressing the *Arabidopsis thaliana* nitrilase II enzyme. *The Plant Journal* **9**, 683–691.
- Schneider EA, Kazakoff CW, Wightman F.** 1985. Gas chromatography-mass spectrometry evidence for several endogenous auxins in pea seedling organs. *Planta* **165**, 232–241.
- Schwartz SH, Léon-Kloosterziel KM, Koornneef M, Zeevaart JAD.** 1997. Biochemical characterization of the *aba2* and *aba3* mutants of *Arabidopsis thaliana*. *Plant Physiology* **114**, 161–166.
- Segal LM, Wightman F.** 1982. Gas chromatographic and GC-MS evidence for the occurrence of 3-indolylpropionic acid and 3-indolylacetic acid in seedlings of *Cucurbita pepo*. *Physiologia Plantarum* **56**, 367–370.
- Seo M, Akaba S, Oritani T, Delarue M, Bellini C, Caboche M, Koshiba T.** 1998. Higher activity of an aldehyde oxidase in the auxin-overproducing *superroot1* mutant of *Arabidopsis thaliana*. *Plant Physiology* **116**, 687–693.
- Sitbon F, Ostin A, Sundberg B, Olsson O, Sandberg G.** 1993. Conjugation of indole-3-acetic acid (IAA) in wild-type and IAA-overproducing transgenic tobacco plants, and identification of the main conjugates by frit-fast atom bombardment liquid chromatography-mass spectrometry. *Plant Physiology* **101**, 313–320.
- Sonner JM, Purves WK.** 1985. Natural Occurrence of indole-3-acetylaspatic acid and indole-3-acetylglutamate in cucumber shoot tissue. *Plant Physiology* **77**, 784–785.
- Staswick PE.** 2009. The tryptophan conjugates of jasmonic and indole-3-acetic acids are endogenous auxin inhibitors. *Plant Physiology* **150**, 1310–1321.
- Staswick PE, Serban B, Rowe M, Tiryaki I, Maldonado MT, Maldonado MC, Suza W.** 2005. Characterization of an *Arabidopsis* enzyme family that conjugates amino acids to indole-3-acetic acid. *Plant Cell* **17**, 616–627.

- Stepanova AN, Robertson-Hoyt J, Yun J, Benavente LM, Xie DY, Dolezal K, Schlereth A, Jurgens G, Alonso JM.** 2008. TAA1-mediated auxin biosynthesis is essential for hormone crosstalk and plant development. *Cell* **133**, 177–191.
- Stepanova AN, Yun J, Robles LM, Novak O, He W, Guo H, Ljung K, Alonso JM.** 2011. The *Arabidopsis* YUCCA1 flavin monooxygenase functions in the indole-3-pyruvic acid branch of auxin biosynthesis. *Plant Cell* **23**, 3961–3973.
- Strader LC, Hendrickson Culler A, Cohen JD, Bartel B.** 2010. Conversion of endogenous indole-3-butyric acid to indole-3-acetic acid drives cell expansion in *Arabidopsis* seedlings. *Plant Physiology* **153**, 1577–1586.
- Strader LC, Monroe-Augustus M, Rogers KC, Lin GL, Bartel B.** 2008. *Arabidopsis iba response5 (ibr5)* suppressors separate responses to various hormones. *Genetics* **180**, 2019–2031.
- Strader LC, Wheeler DL, Christensen SE, Berens JC, Cohen JD, Rampey RA, Bartel B.** 2011. Multiple facets of *Arabidopsis* seedling development require indole-3-butyric acid-derived auxin. *Plant Cell* **23**, 984–999.
- Strader LC, Bartel B.** 2008. A new path to auxin. *Nature Chemical Biology* **4**, 337–339.
- Strader LC, Bartel B.** 2009. The *Arabidopsis* PLEIOTROPIC DRUG RESISTANCE8/ABCG36 ATP binding cassette transporter modulates sensitivity to the auxin precursor indole-3-butyric acid. *Plant Cell* **21**, 1992–2007.
- Strader LC, Bartel B.** 2011. Transport and metabolism of the endogenous auxin precursor indole-3-butyric acid. *Molecular Plant* **4**, 477–486.
- Sugawara S, Hishiyama S, Jikumaru Y, Hanada A, Nishimura T, Koshiba T, Zhao Y, Kamiya Y, Kasahara H.** 2009. Biochemical analyses of indole-3-acetaldoxime-dependent auxin biosynthesis in *Arabidopsis*. *Proceedings of the National Academy of Sciences, USA* **106**, 5430–5435.
- Sutter EG, Cohen JD.** 1992. Measurement of indolebutyric acid in plant tissues by isotope dilution gas chromatography-mass spectrometry analysis. *Plant Physiology* **99**, 1719–1722.
- Szerszen JB, Szczyglowski K, Bandurski RS.** 1994. *iaglu*, a gene from *Zea mays* involved in conjugation of growth hormone indole-3-acetic acid. *Science* **265**, 1699–1701.
- Sztein AE, Cohen JD, de la Fuente IG, Cooke TJ.** 1999. Auxin metabolism in mosses and liverworts. *American Journal of Botany* **86**, 1544–1555.
- Sztein AE, Cohen JD, Cooke TJ.** 2000. Evolutionary patterns in the auxin metabolism of green plants. *International Journal of Plant Sciences* **161**, 849–859.
- Tam YY, Epstein E, Normanly J.** 2000. Characterization of auxin conjugates in *Arabidopsis*. Low steady-state levels of indole-3-acetyl-aspartate, indole-3-acetyl-glutamate, and indole-3-acetyl-glucose. *Plant Physiology* **123**, 589–595.
- Tam YY, Normanly J.** 1998. Determination of indole-3-pyruvic acid levels in *Arabidopsis thaliana* by gas chromatography-selected ion monitoring-mass spectrometry. *Journal of Chromatography A* **800**, 101–108.
- Tao Y, Ferrer JL, Ljung K, et al.** 2008. Rapid synthesis of auxin via a new tryptophan-dependent pathway is required for shade avoidance in plants. *Cell* **133**, 164–176.
- Tivendale ND, Davidson SE, Davies NW, et al.** 2012. Biosynthesis of the halogenated auxin, 4-chloroindole-3-acetic acid. *Plant Physiology* **159**, 1055–1063.
- Tivendale ND, Davies NW, Molesworth PP, Davidson SE, Smith JA, Lowe EK, Reid JB, Ross JJ.** 2010. Reassessing the role of *N*-hydroxytryptamine in auxin biosynthesis. *Plant Physiology* **154**, 1957–1965.
- Tognetti VB, Van Aken O, Morreel K, et al.** 2010. Perturbation of indole-3-butyric acid homeostasis by the UDP-glucosyltransferase *UGT74E2* modulates *Arabidopsis* architecture and water stress tolerance. *Plant Cell* **22**, 2660–2679.
- Tsurumi S, Wada S.** 1980. Metabolism of indole-3-acetic acid and natural occurrence of dioxindole-3-acetic acid derivatives in *Vicia* roots. *Plant and Cell Physiology* **21**, 1515–1525.
- Tsurusaki K, Takeda K, Sakurai N.** 1997. Conversion of indole-3-acetaldehyde to indole-3-acetic acid in cell-wall fraction of barley (*Hordeum vulgare*) seedlings. *Plant and Cell Physiology* **38**, 268–273.
- Tuominen H, Östin A, Sandberg G, Sundberg B.** 1994. A novel metabolic pathway for indole-3-acetic acid in apical shoots of *Populus tremula* (L.) × *Populus tremuloides* (Michx.). *Plant Physiology* **106**, 1511–1520.
- Walz A, Park S, Slovin JP, Ludwig-Müller J, Momonoki YS, Cohen JD.** 2002. A gene encoding a protein modified by the phytohormone indoleacetic acid. *Proceedings of the National Academy of Sciences, USA* **99**, 1718–1723.
- Westfall CS, Herrmann J, Chen Q, Wang S, Jez JM.** 2010. Modulating plant hormones by enzyme action: the GH3 family of acyl acid amido synthetases. *Plant Signaling & Behavior* **5**, 1607–1612.
- Westfall CS, Zubieta C, Herrmann J, Kapp U, Nanao MH, Jez JM.** 2012. Structural basis for prereceptor modulation of plant hormones by GH3 proteins. *Science* **336**, 1708–1711.
- Wightman F, Lighty DL.** 1982. Identification of phenylacetic acid as a natural auxin in the shoots of higher plants. *Physiologia Plantarum* **55**, 17–24.
- Wightman F, Rauthan BS.** 1974. Evidence for the biosynthesis and natural occurrence of the auxin, phenylacetic acid, in shoots of higher plants. In: *Plant Growth Substances* 1973. Tokyo: Hirokawa Publishing Co., 15–27.
- Won C, Shen X, Mashiguchi K, Zheng Z, Dai X, Cheng Y, Kasahara H, Kamiya Y, Chory J, Zhao Y.** 2011. Conversion of tryptophan to indole-3-acetic acid by TRYPTOPHAN AMINOTRANSFERASES OF ARABIDOPSIS and YUCCAs in *Arabidopsis*. *Proceedings of the National Academy of Sciences, USA* **108**, 18518–18523.
- Woodward AW, Bartel B.** 2005. Auxin: regulation, action, and interaction. *Annals of Botany* **95**, 707–735.
- Woodward C, Bemis SM, Hill EJ, Sawa S, Koshiba T, Torii KU.** 2005. Interaction of auxin and ERECTA in elaborating *Arabidopsis* inflorescence architecture revealed by the activation tagging of a new member of the YUCCA family putative flavin monooxygenases. *Plant Physiology* **139**, 192–203.

- Wright AD, Sampson MB, Neuffer MG, Michalczuk L, Slovin JP, Cohen JD.** 1991. Indole-3-acetic acid biosynthesis in the mutant maize *orange pericarp*, a tryptophan auxotroph. *Science* **254**, 998–1000.
- Yamada M, Greenham K, Prigge MJ, Jensen PJ, Estelle M.** 2009. The *TRANSPORT INHIBITOR RESPONSE2* gene is required for auxin synthesis and diverse aspects of plant development. *Plant Physiology* **151**, 168–179.
- Yan H, Wang F, Han D, Yang G.** 2012. Simultaneous determination of four plant hormones in bananas by molecularly imprinted solid-phase extraction coupled with high performance liquid chromatography. *Analyst* **137**, 2884–2890.
- Yang Y, Xu R, Ma CJ, Vlot AC, Klessig DF, Pichersky E.** 2008. Inactive methyl indole-3-acetic acid ester can be hydrolyzed and activated by several esterases belonging to the *AtMES* esterase family of *Arabidopsis*. *Plant Physiology* **147**, 1034–1045.
- Zhao Y.** 2012. Auxin biosynthesis: a simple two-step pathway converts tryptophan to indole-3-acetic acid in plants. *Molecular Plant* **5**, 334–338.
- Zhao Y, Christensen SK, Fankhauser C, Cashman JR, Cohen JD, Weigel D, Chory J.** 2001. A role for flavin monooxygenase-like enzymes in auxin biosynthesis. *Science* **291**, 306–309.
- Zhao Y, Hull AK, Gupta NR, Goss KA, Alonso J, Ecker JR, Normanly J, Chory J, Celenza JL.** 2002. Trp-dependent auxin biosynthesis in *Arabidopsis*: involvement of cytochrome P450s CYP79B2 and CYP79B3. *Genes & Development* **16**, 3100–3112.
- Zolman BK, Martinez N, Millius A, Adham AR, Bartel B.** 2008. Identification and characterization of *Arabidopsis* indole-3-butyric acid response mutants defective in novel peroxisomal enzymes. *Genetics* **180**, 237–251.
- Zolman BK, Nyberg M, Bartel B.** 2007. IBR3, a novel peroxisomal acyl-CoA dehydrogenase-like protein required for indole-3-butyric acid response. *Plant Molecular Biology* **64**, 59–72.
- Zolman BK, Yoder A, Bartel B.** 2000. Genetic analysis of indole-3-butyric acid responses in *Arabidopsis thaliana* reveals four mutant classes. *Genetics* **156**, 1323–1337.
- Zubieta C, Ross JR, Koscheski P, Yang Y, Pichersky E, Noel JP.** 2003. Structural basis for substrate recognition in the salicylic acid carboxyl methyltransferase family. *Plant Cell* **15**, 1704–1716.
